# Supplementary material for: Diverse Ag(i) complexes constructed from methyl-4-(5-halopyrimidin-2-ylcarbamoyl)benzoate ligands: roles of the halogen atom and anion
Source: Royal Society of Chemistry journal article supplement (doi:10.1039/c1ce05102d), 2011-01-01

**Figure S1.** The TGA curves for **1 – 8**.

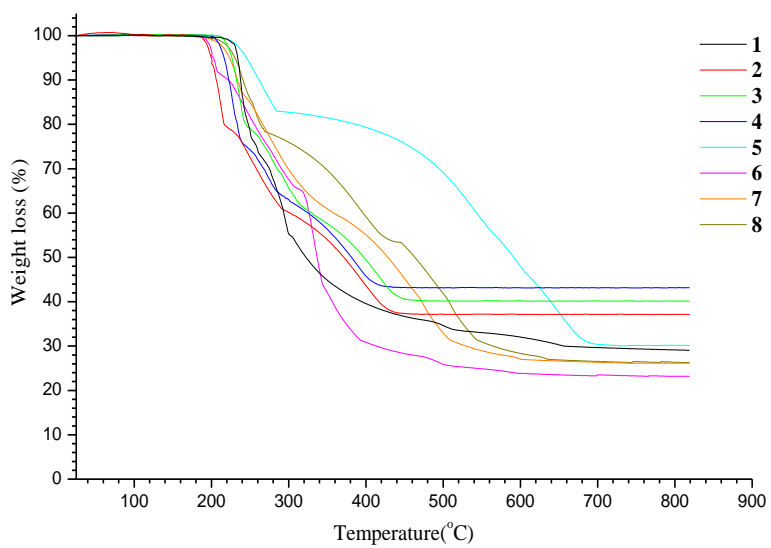

**Figure S2.** (a) Coordination environment about the silver center of **2**, showing one orientation of the disordered  $\text{NO}_3^-$  anion. Thermal ellipsoids are shown at 30 % probability level. Symmetry code A:  $x + 1, y - 1, z$ ; B:  $-x + 4, -y - 1, -z + 2$ ; C:  $x, y + 1, z$ ; D:  $x, y - 1, z$ . (b) Coordination environment about the silver center of **3**, showing one orientation of the disordered  $\text{NO}_3^-$  anion. Thermal ellipsoids are shown at 30 % probability level. Symmetry code A:  $x + 1, y - 1, z$ ; B:  $-x + 1, -y + 1, -z + 1$ ; C:  $x, y + 1, z$ ; D:  $x, y - 1, z$ .

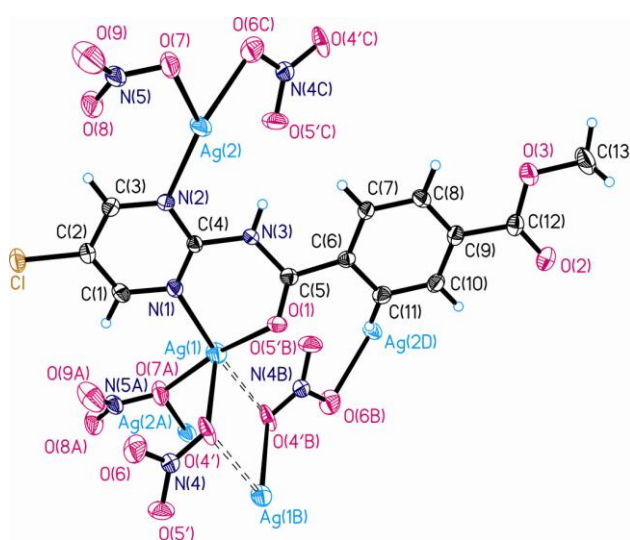

(a)

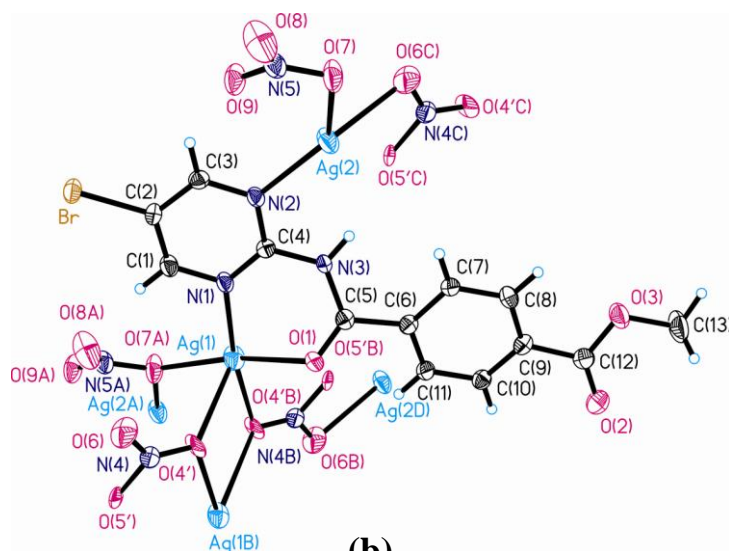

(b)

**Figure S3.** Coordination environment about the Ag(I) center of **4**, showing one orientation of the disordered NO<sub>3</sub><sup>-</sup> anion. Thermal ellipsoids are shown at 30 % probability level. Symmetry code A:  $x, y + 1, z$ .

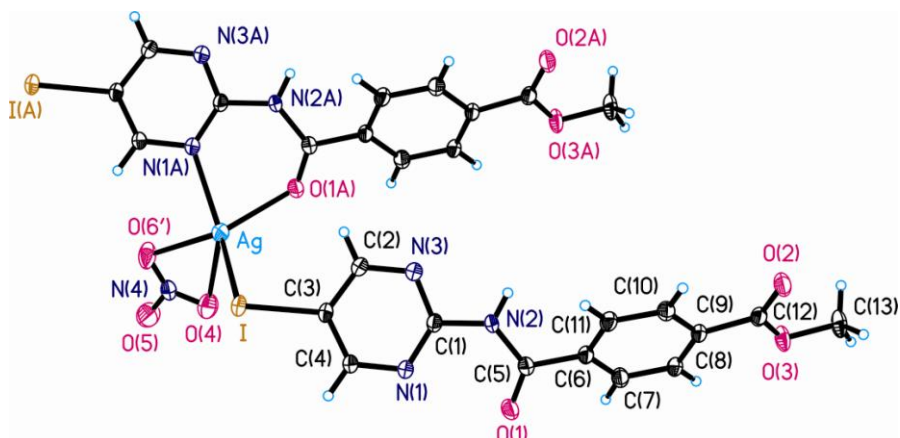

Supplement: c1ce05102d.pdf [file c1ce05102d.pdf]
